# Supplementary material for: Identification of Some New Triply Periodic Mesophases from Molten Block Copolymers
Source: MDPI journal article supplement (doi:10.3390/polym11061081), 2019-06-25
Supplement: s1 [file s1]

# Identification of Some New Triply Periodic Mesophases from Molten Block Copolymers

Junhan Cho

Department of Polymer Science & Engineering and Center for Photofunctional Energy Materials, Dankook University, 152 Jukjeon-ro, Suji-gu, Yongin-si, Gyeonggi-do 16890, Korea; jhcho@dankook.ac.kr

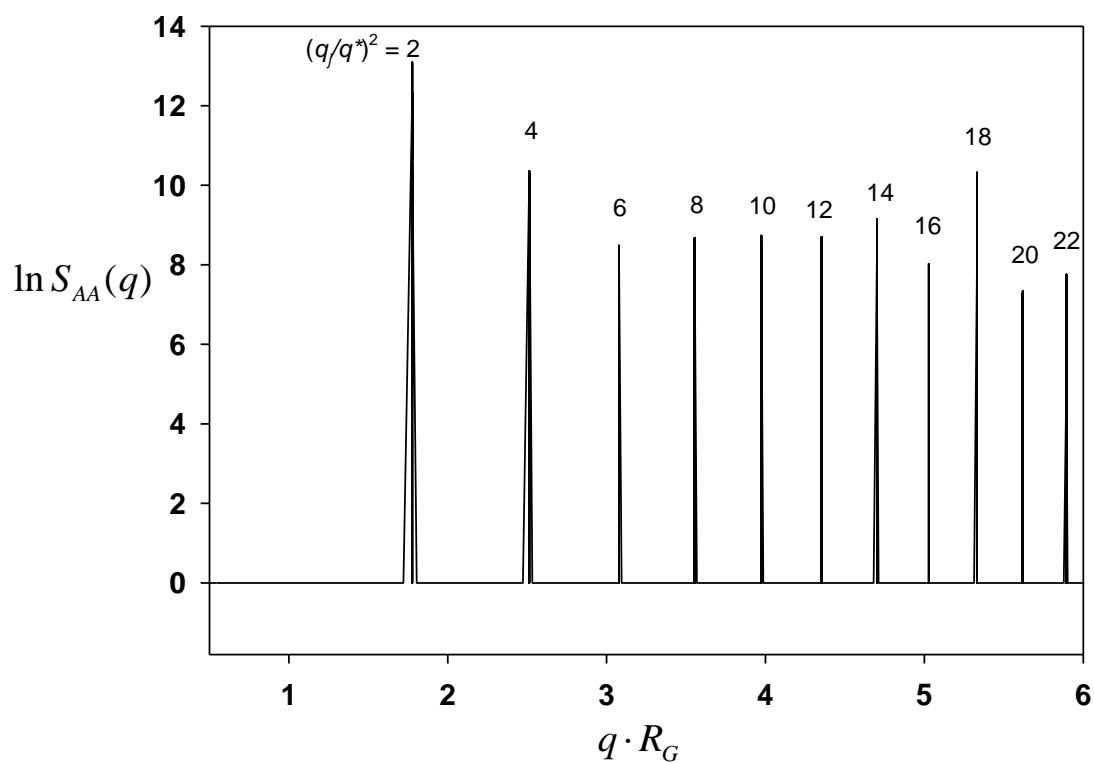

Figure S1. Correlation function  $S_{AA}(q)$  for A block plotted against the scattering vector  $q$  for incompressible AB diblock copolymer melt at  $\phi_A = 0.4$  and at  $N\chi = 14$ , whose morphology is evolved from Equation (11).

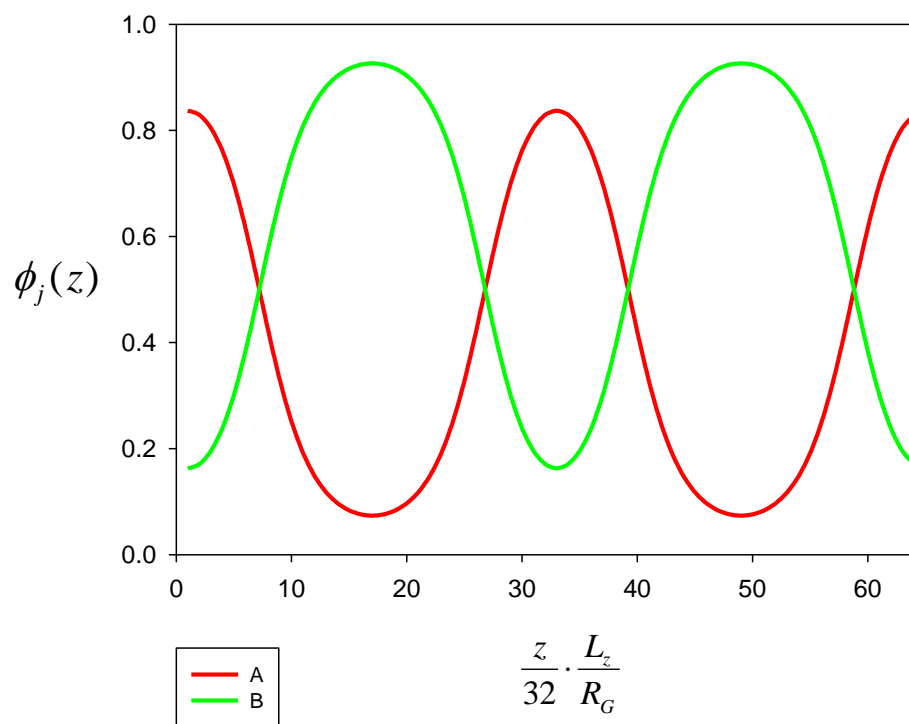

Figure S2. Local composition profiles for incompressible AB diblock copolymer melt at  $\phi_A = 0.4$  and at  $N\chi = 14$  exhibiting the lamellar morphology, where  $L_z$  indicates the equilibrium lamellar period.
